# Supplementary material for: Core-Shell Structured SiO2@NiFe LDH Composite for Broadband Electromagnetic Wave Absorption
Source: MDPI journal article supplement (doi:10.3390/ijms24010504), 2022-12-28
Supplement: s1 [file s1]

## Supplementary Material

# Core-Shell Structured SiO<sub>2</sub>@NiFe LDH Composite for Broadband Electromagnetic Wave Absorption

Zhilan Du <sup>1,†</sup>, Dashuang Wang <sup>1,†</sup>, Xinfang Zhang <sup>1</sup>, Zhiyu Yi <sup>1</sup>, Jihai Tang <sup>2</sup>, Pingan Yang <sup>3</sup>, Rui Cai <sup>3</sup>, Shuang Yi <sup>1</sup>, Jinsong Rao <sup>1</sup> and Yuxin Zhang <sup>1,\*</sup>

<sup>1</sup> College of Material Science and Engineering, Chongqing University, Chongqing 400044, China

<sup>2</sup> No. 59 Research Institute of China Ordnance Industries, Chongqing 400039, China

<sup>3</sup> School of Automation, Chongqing University of Posts and Telecommunications, Chongqing 400065, China

\* Correspondence: zhangyuxin@cqu.edu.cn

† These authors contributed equally to this work.

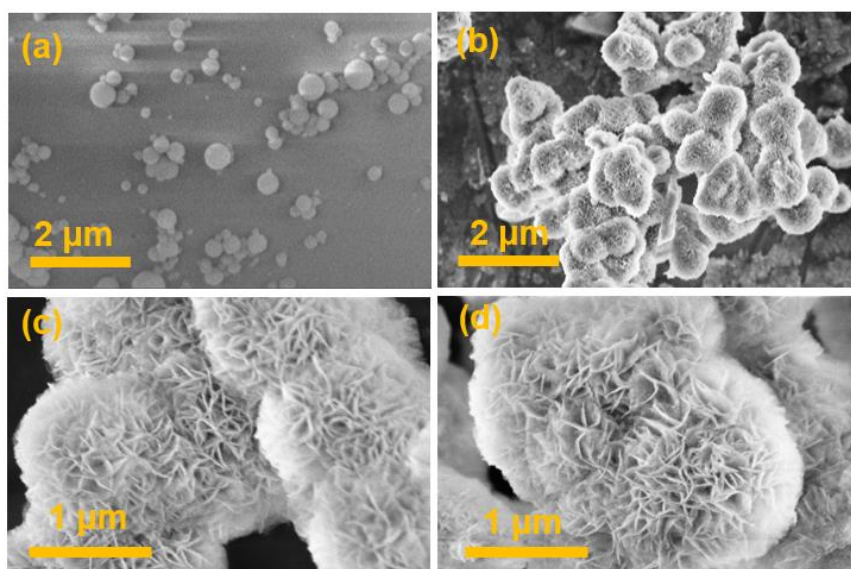

**Figure S1.** (a) SEM image of  $\text{SiO}_2$ ; (b-d) the enlarged images of  $\text{SiO}_2$ @NiFe-LDH-3.

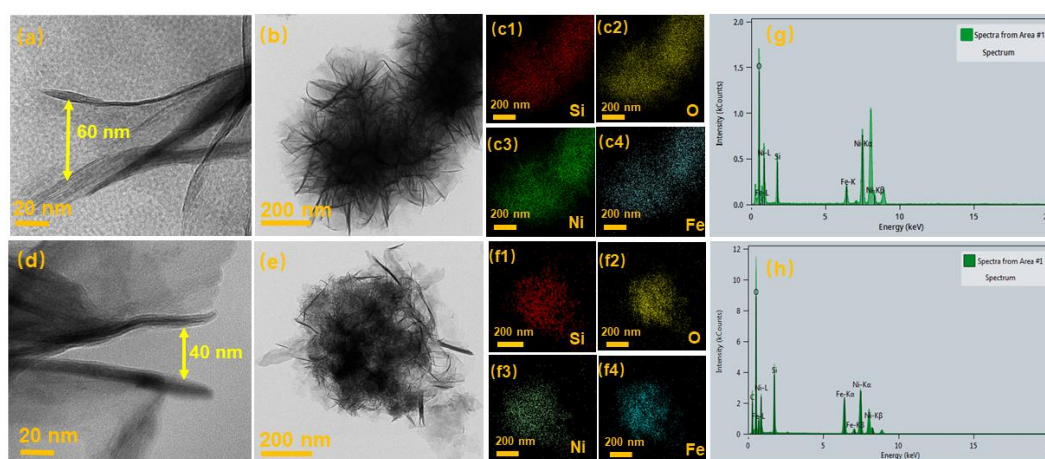

**Figure S2.** TEM image of (a) the enlarged detail of  $\text{SiO}_2$ @NiFe LDH-1; (b)  $\text{SiO}_2$ @NiFe LDH-1; (c1-c4) the EDS Mapping of  $\text{SiO}_2$ @NiFe LDH-1; (d) the enlarged detail of  $\text{SiO}_2$ @NiFe LDH-2; (e)  $\text{SiO}_2$ @NiFe LDH-2; (f1-f4) the EDS Mapping of  $\text{SiO}_2$ @NiFe LDH-2; (g) EDS spectrum of  $\text{SiO}_2$ @NiFe LDH-1; (h) EDS spectrum of  $\text{SiO}_2$ @NiFe LDH-2.

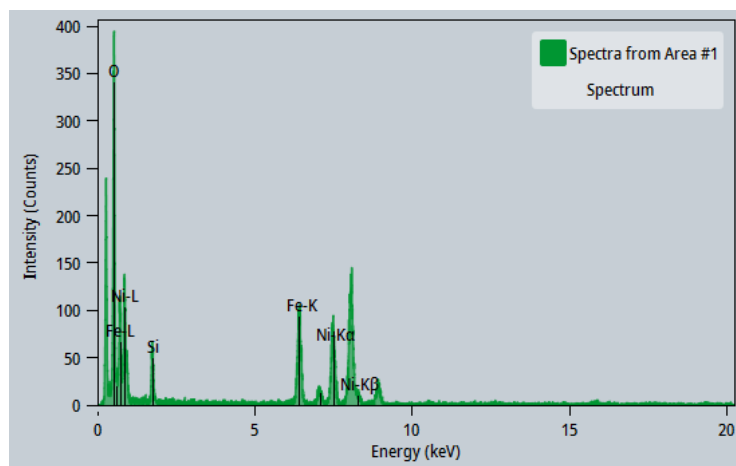

**Figure S3.** EDS spectrum of SiO<sub>2</sub>@NiFe LDH-3.

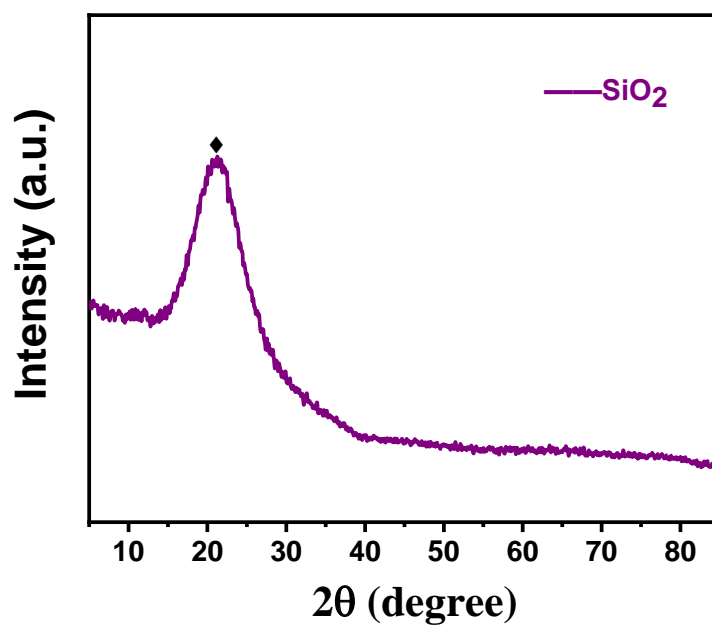

**Figure S4.** The XRD pattern of SiO<sub>2</sub>.

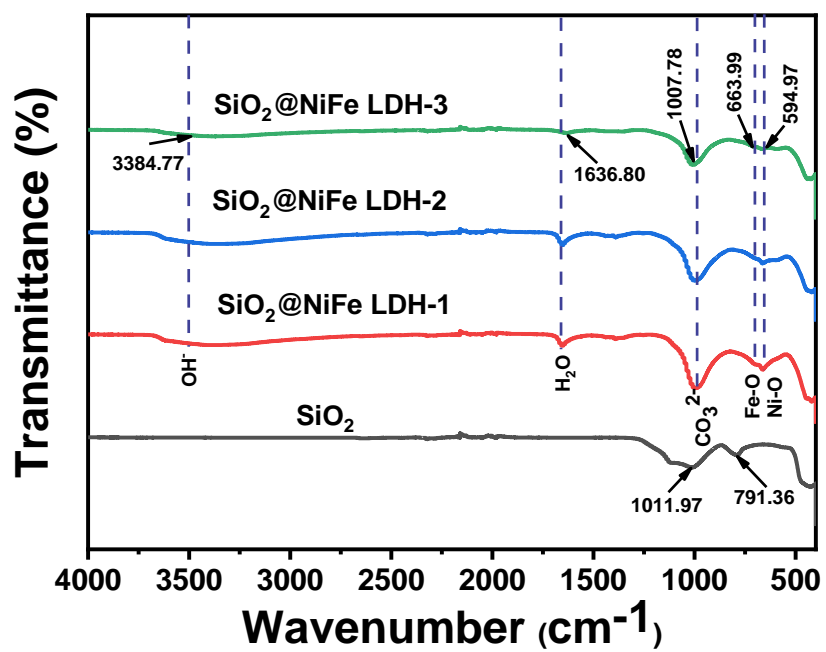

Figure S5. FT-IR spectra of  $\text{SiO}_2$  and  $\text{SiO}_2$ @NiFe LDH-1, 2, 3.

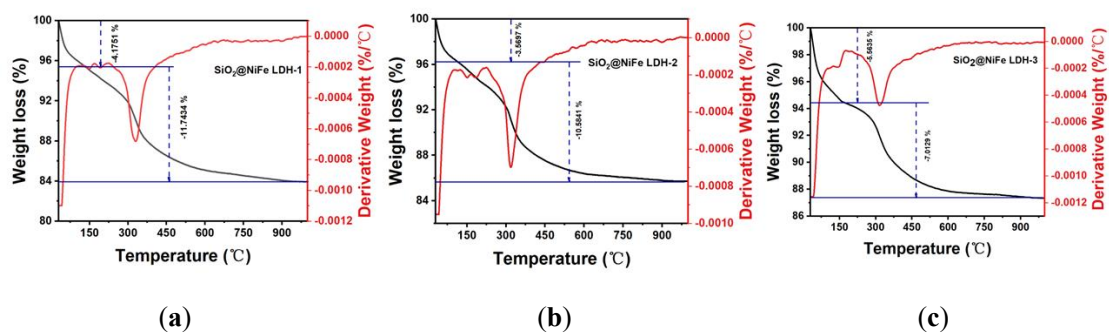

**Figure S6.** The TGA of (a)  $\text{SiO}_2@\text{NiFe}$  LDH-1, (b)  $\text{SiO}_2@\text{NiFe}$  LDH-2, (c)  $\text{SiO}_2@\text{NiFe}$  LDH-3.

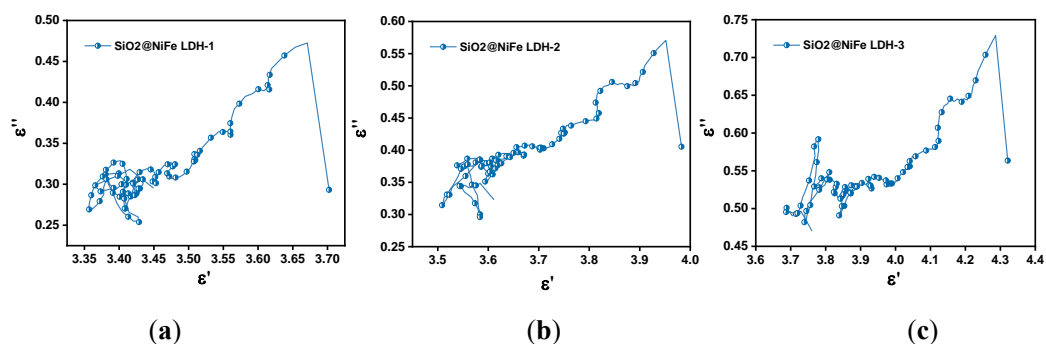

**Figure S7.** Cole-Cole semicircles of (a)  $\text{SiO}_2@\text{NiFe}$  LDH-1, (b)  $\text{SiO}_2@\text{NiFe}$  LDH-2 and (c)  $\text{SiO}_2@\text{NiFe}$  LDH-3.
